# Supplementary material for: Optimizing Spectronaut Search Parameters to Improve Data Quality with Minimal Proteome Coverage Reductions in DIA Analyses of Heterogeneous Samples
Source: PubMed Central journal article supplement (PMC11165578; doi:10.1021/acs.jproteome.3c00671), 2024-05-01
Supplement: pr3c00671_si_001.pdf [file pr3c00671_si_001.pdf]

## Supplementary data for

# Optimising Spectronaut search parameters to improve data quality with minimal proteome coverage reductions in DIA analyses of heterogeneous samples

Christa P. Baker<sup>1</sup>, Roland Bruderer<sup>2</sup>, James Abbott<sup>3</sup>, J. Simon C. Arthur<sup>1\*</sup>, Alejandro J. Brenes<sup>1,4\*</sup>

### Affiliations:

1- Division of Cell Signalling & Immunology, School of Life Sciences, University of Dundee, United Kingdom

2- Biognosys AG, Schlieren, Switzerland

3- Data Analysis Group, Division of Computational Biology, School of Life Sciences, University of Dundee, United Kingdom

4- Present address: Centre for Inflammation Research, Institute for Regeneration and Repair, University of Edinburgh, EH16 4UU, United Kingdom

\* correspondence: Alejandro J. Brenes, abrenes@ed.ac.uk, Simon Arthur, j.s.c.arthur@dundee.ac.uk

### Table of contents

**Supplemental Figure 1: XIC for DAGTIAGLNVMR\_.2 with standard settings**

**Supplemental Figure 2: XIC for DAGTIAGLNVMR\_.2 with stringent settings**

**Supplemental Figure 3: XIC for AADETISWLDANQTATQEEFADQKELESK\_.3**

**Supplemental Figure 4: XIC for MSSHIFDLK\_.1**

**Supplemental Figure 5: Significantly changed proteins across the different Spectronaut settings**

HSP72\_CANAL\_DAGTIAGLNVMR\_2 Standard settings

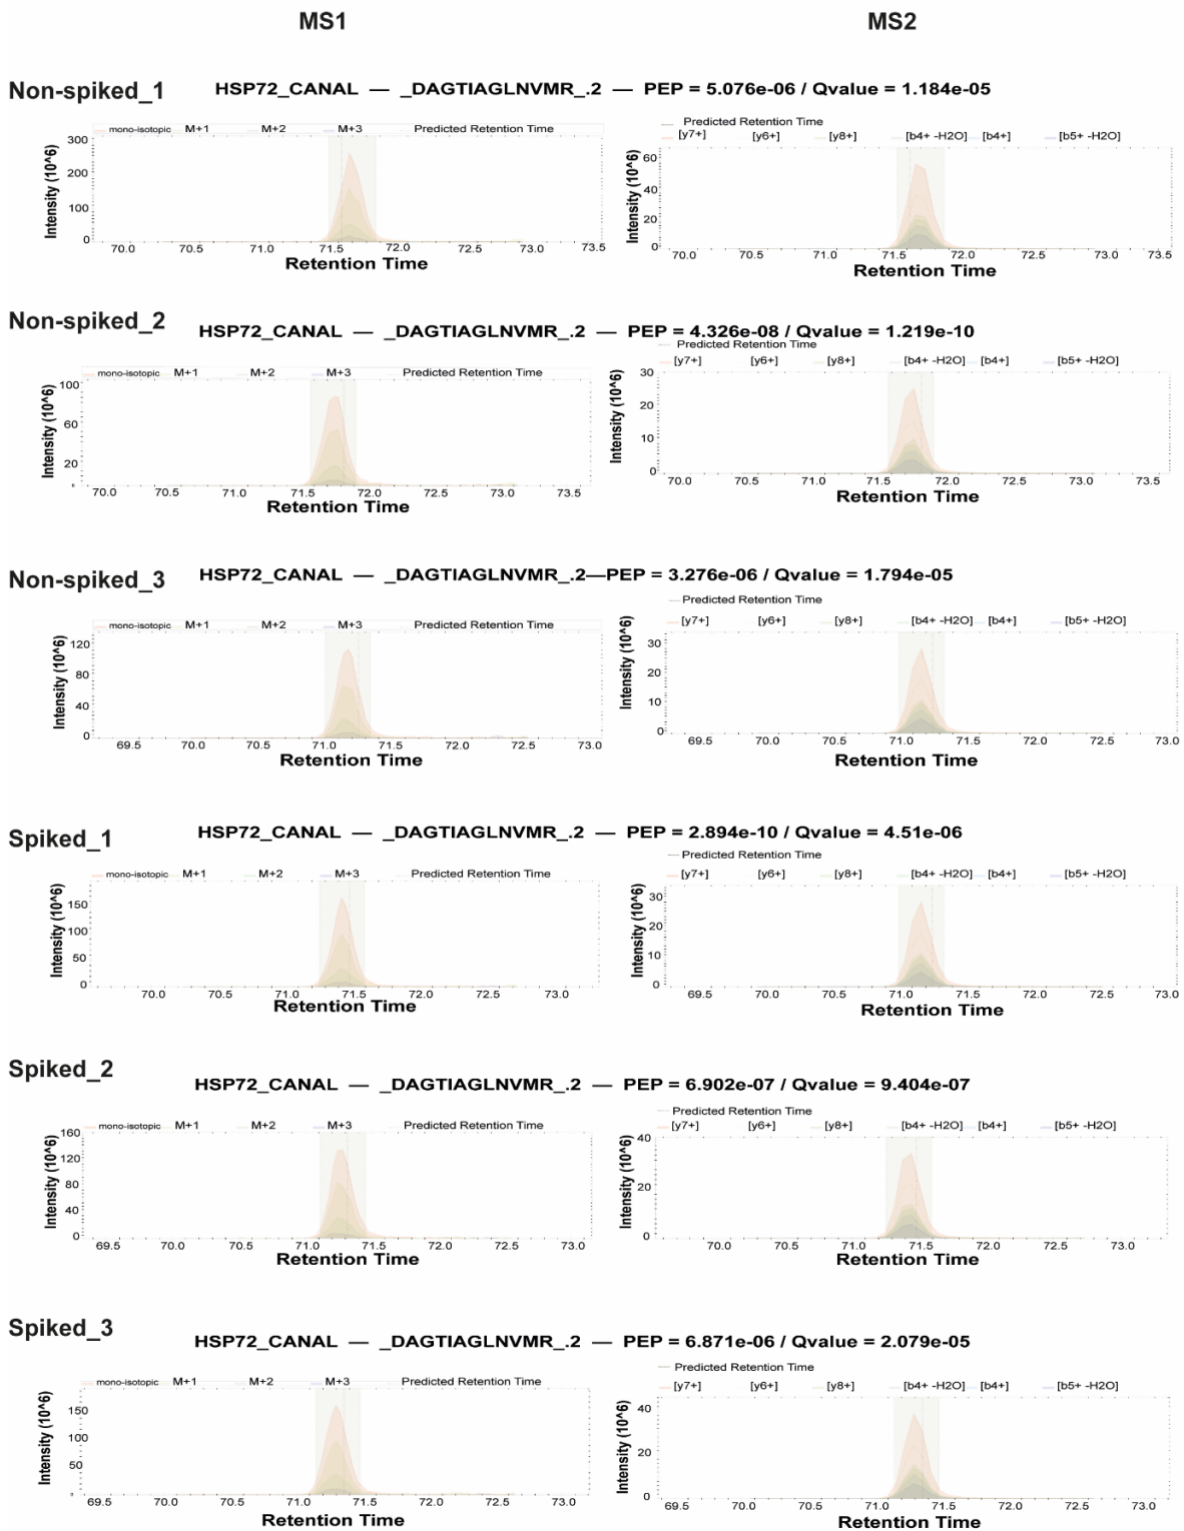

**Supplementary Figure 1:** Spectronaut 17 default settings MSI and MS2 extracted ion chromatogram (XIC) profiles for *C. albicans* protein HSP72 and precursor DAGTIAGLNVMR\_2, across all samples, both spiked and non-spiked.

HSP72\_DAGTIAGLNVMR\_2\_Stringent settings  
MS1

MS2

Non-spiked\_1

HSP72\_CANAL — \_DAGTIAGLNVMR\_2 — PEP = 5.076e-06 / Qvalue = 1.184e-05

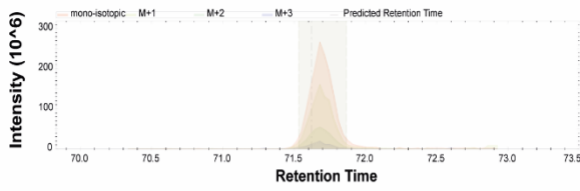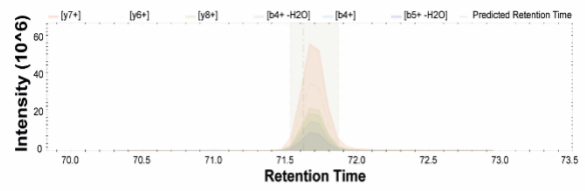

Non-spiked\_2

HSP72\_CANAL — \_DAGTIAGLNVMR\_2 — PEP = 4.326e-08 / Qvalue = 1.219e-10

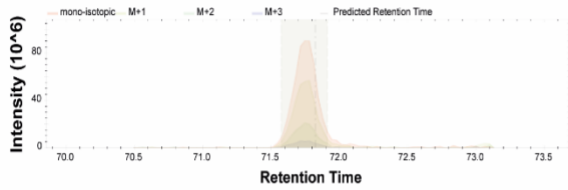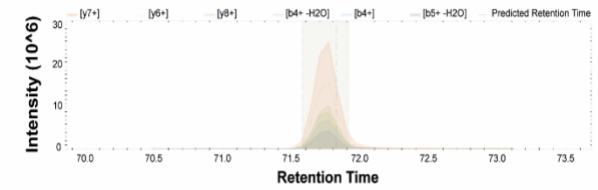

Non-spiked\_3

HSP72\_CANAL — \_DAGTIAGLNVMR\_2 — PEP = 3.276e-06 / Qvalue = 1.794e-05

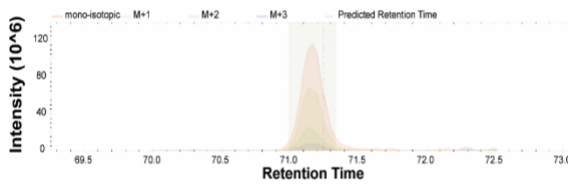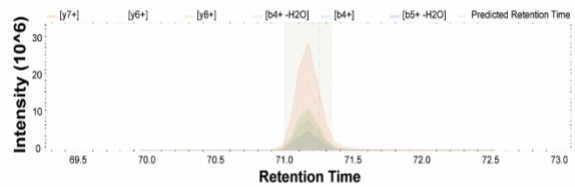

Spiked\_1

HSP72\_CANAL — \_DAGTIAGLNVMR\_2 — PEP = 2.894e-10 / Qvalue = 4.51e-06

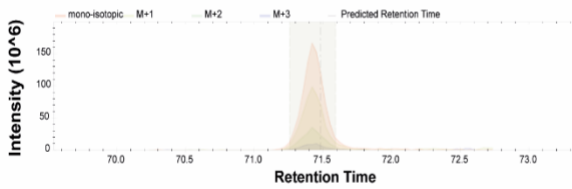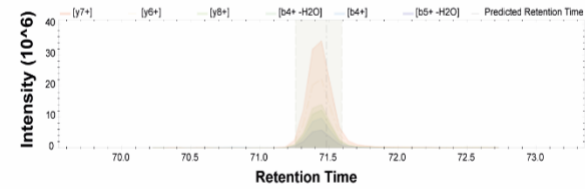

Spiked\_2

HSP72\_CANAL — \_DAGTIAGLNVMR\_2 — PEP = 6.902e-07 / Qvalue = 9.404e-07

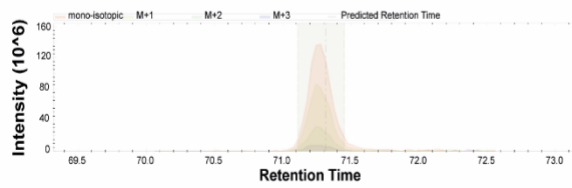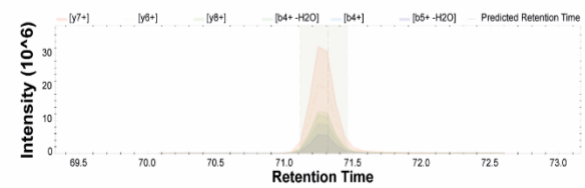

Spiked\_3

HSP72\_CANAL — \_DAGTIAGLNVMR\_2 — PEP = 6.871e-06 / Qvalue = 2.079e-05

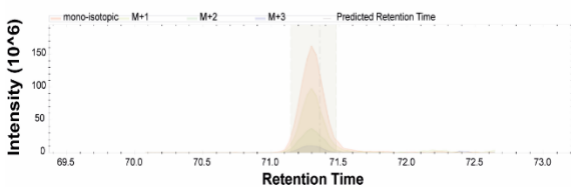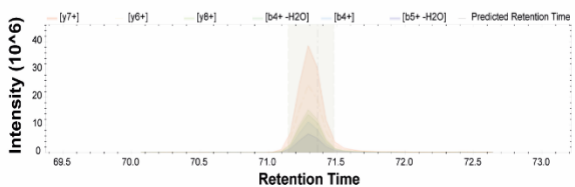

**Supplementary Figure 2:** Spectronaut 17 stringent settings MSI and MS2 extracted ion chromatogram (XIC) profiles for *C. albicans* protein HSP72 and precursor DAGTIAGLNVMR\_2, across all samples, both spiked and non-spiked.

HSP72\_AADETISWLDANQTATQEEFADQQKELESK\_3

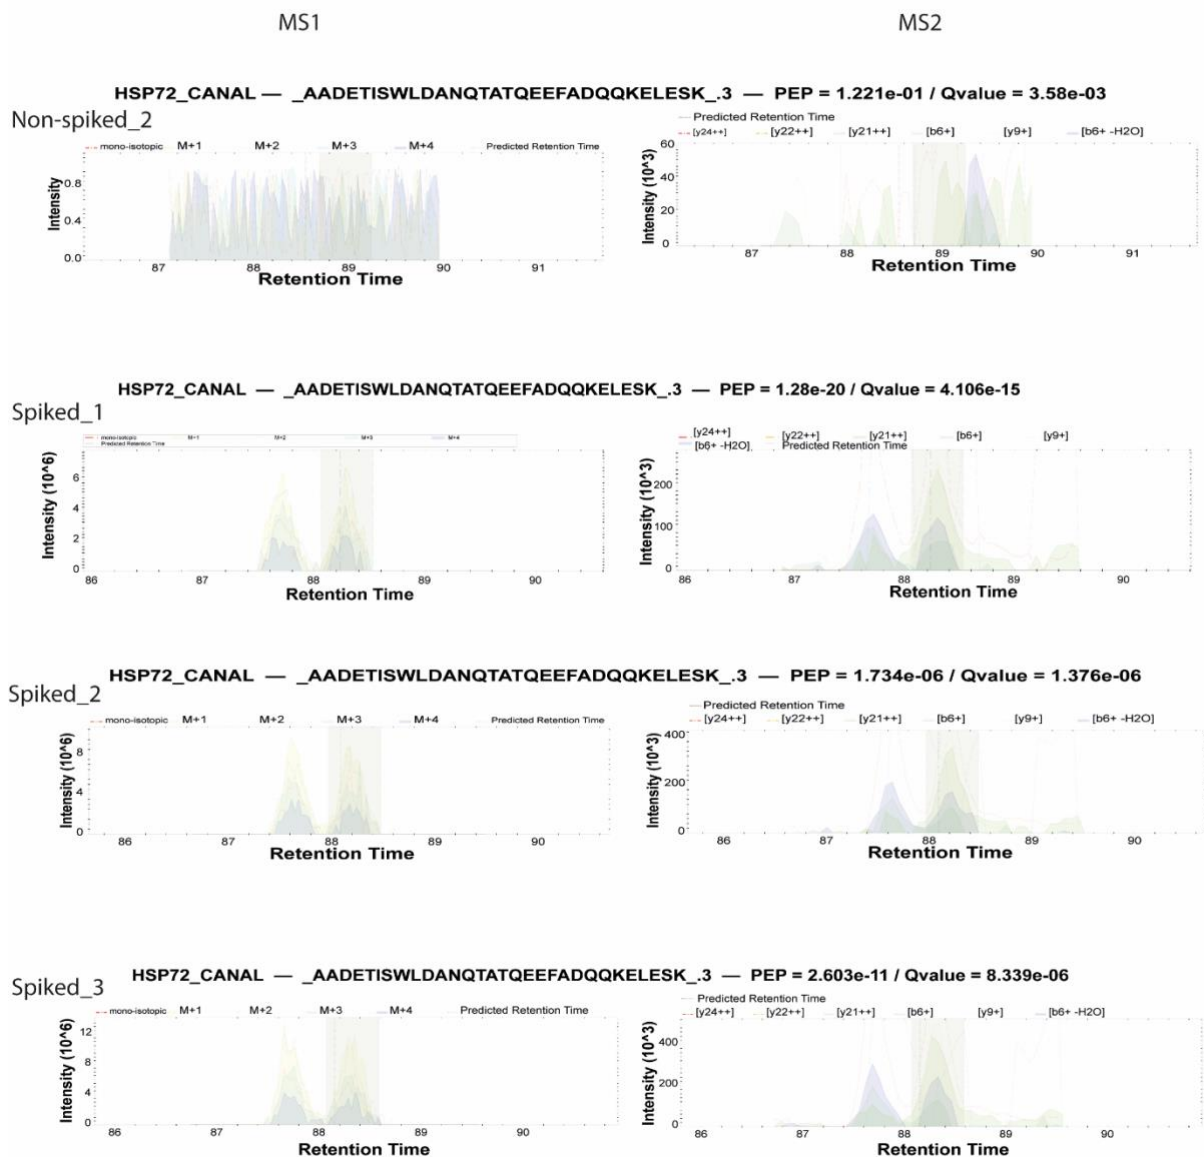

**Supplementary Figure 3:** Spectronaut 17 default settings MSI and MS2 extracted ion chromatogram (XIC) profiles for *C. albicans* protein HSP72 and precursor AADETISWLDANQTATQEEFADQQKELESK\_3, across all samples, both spiked and non-spiked.

MCR1\_Canal\_\_MSSHIFDLK\_1

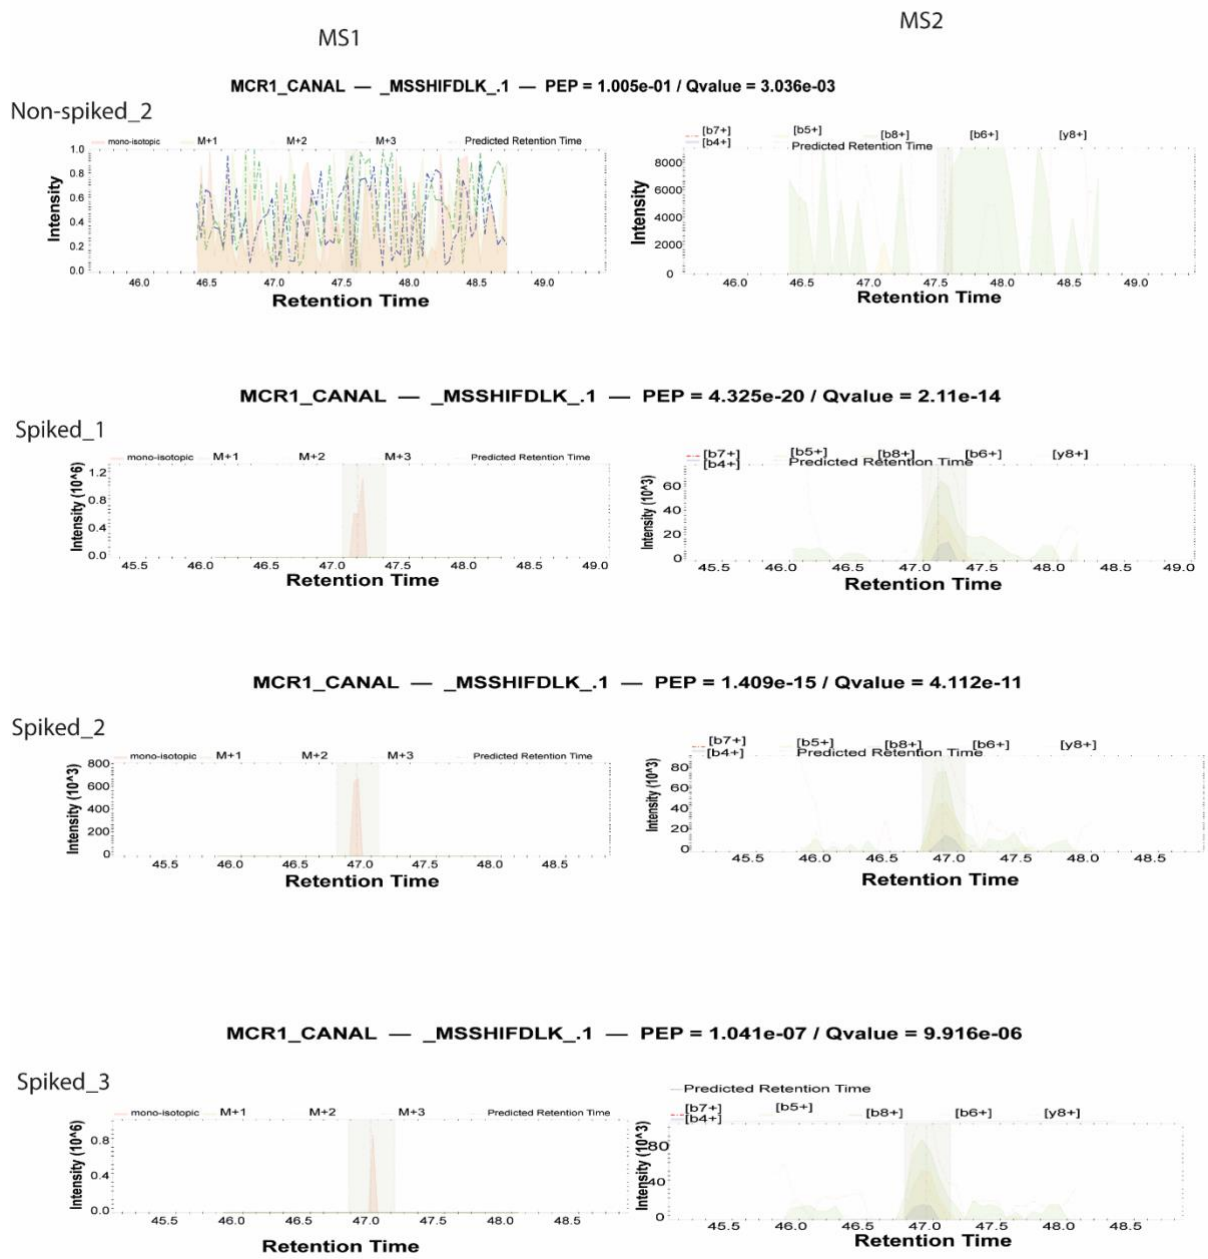

**Supplementary Figure 4:** Spectronaut 17 default settings MSI and MS2 extracted ion chromatogram (XIC) profiles for *C. albicans* protein HSP72 and precursor MSSHIFDLK\_1, across all samples, both spiked and non-spiked.

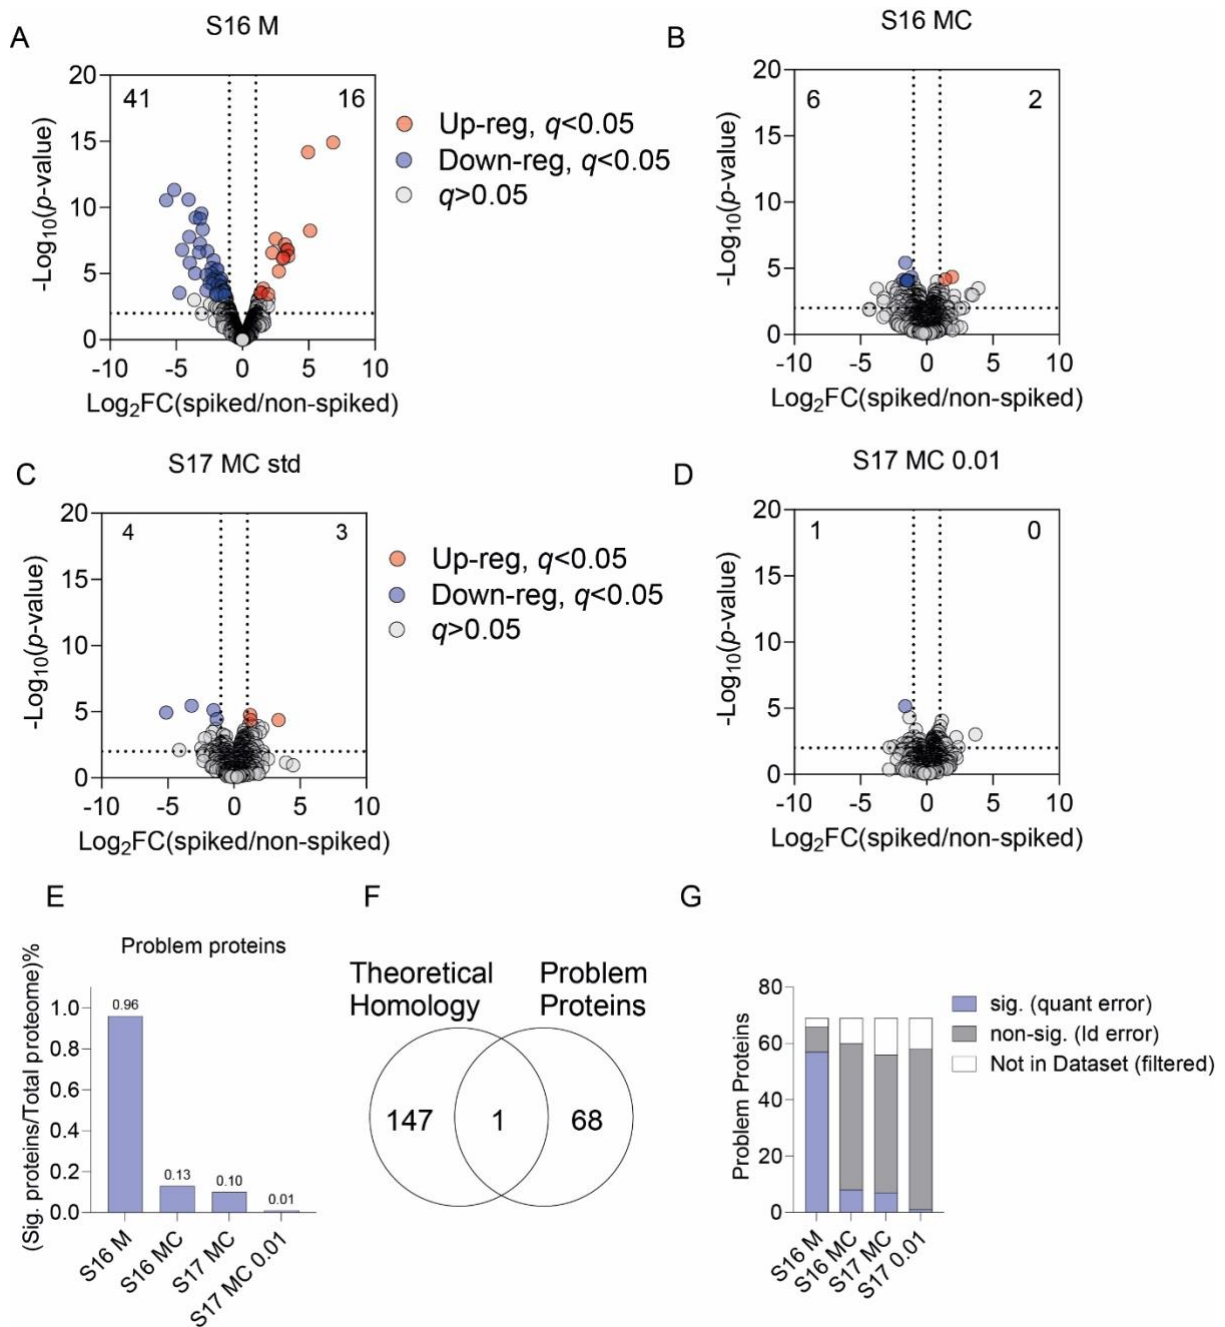

**Supplementary Figure 5.** Volcano plots for (A) Spectronaut 16, default settings with a Mouse only FASTA file, and (B) Spectronaut 16, default settings (C) Spectronaut 17, default settings and (D) Spectronaut 17 with 0.01 identification settings with a Mouse FASTA and a Candida FASTA. (D-E) The significant proteins from each analysis were pooled to make a compiled list of "problematic proteins"  $q$ -value  $< 0.05$  and fold change  $> 2$ . (E) Plots problematic proteins in each analysis as a percentage of the total proteins identified in the dataset. (F) compares this list of Mouse problematic proteins against the theoretical homology between Mouse and *C. albicans* to determine how many of these errors are due to homology or misidentification while (G) plots the problematic proteins, highlighting the number of significant or non-significant proteins for that analysis, as well as proteins that were not identified in the analysis. Volcano plots show the  $\text{Log}_2$  fold change (spiked vs non-spiked), and the  $-\text{Log}_{10}$  p-value and highlights proteins with a p-value  $< 0.01$  and  $-2 > \text{FC} > 2$ .
